# Supplementary material for: Prevalence of urogenital, anal, and pharyngeal infections with Chlamydia trachomatis, Neisseria gonorrhoeae, and Mycoplasma genitalium: a cross-sectional study in Reunion island
Source: PubMed Central journal article supplement (PMC7818901; doi:10.1186/s12879-021-05801-9), 2021-01-21
Supplement: 12879_2021_5801_MOESM1_ESM.pdf [file 12879_2021_5801_MOESM1_ESM.pdf]

Valid  Not valid

## Anonymous STI (Sexually Transmitted Infection) Questionnaire

CHU La Réunion, Saint Pierre

Anonymization  
number

Month of consultation : Jan. Feb. Mar. April May June July Aug. Sept.

Oct. Nov. Dec.

Year of consultation : 2014 2015 2016

Do not fold

Sex  Male  Female

Age *dizaine* 1 2 3 4 5 6 7 8 9

*unit* 0 1 2 3 4 5 6 7 8 9

You are :  Single  In a relationship  Married

Reason for consultation :  Recent risk taking  Clinical signs suggestive of STIs  Screening because STI at partner's  
 Health check / end of relationship  Desire to stop using a condom / new relationship  Control at 6 weeks  Others

Have you stayed in the last 2 years in :  Madagascar  South Africa  West Africa  East Africa  
 North Africa  Comoros  Asia  Australia  South America  Eastern Europe

If you have taken a recent risk :

It was :  1 day ago  2 to 3 days ago  4 to 7 days ago  7 to 15 days ago  15 to 30 days ago  more than 30 days

It was :  A man  A woman

It was in one of the countries mentioned above  Yes  No

It was at :  la souris chaude  St Gilles  St Pierre  Etang salé  Pierrefond / Pointe du diable  St Louis  St Paul  St Joseph

Tampon  Ligne Paradis  Bois d'olive  Ligne des Bambous  Terre sainte  Ravine blanche  other .....

It was :  at the beach  at your home  at her/him  in nightclub/bar/pub  in nature  at work  in a hotel  other.....

Have you ever been screened for sexually transmitted diseases?  Yes  No

If yes : it was  less than 1 month  1-3 months  3-6 months  6-12 months  1 to 2 years  more than 2 years

Have you ever had / Have you:  syphilis  HIV  hepatitis B  hepatitis C  gonococcus  chlamydia  
 herpes on sex  I have never had these diseases

You have :  urinary burns  sex purulent flow  blood while urinating  
 sex erosions/ulcerations  mouth erosions/ulcerations  
 anus pain/burns  recent pimples on the skin  
 I have no symptom  I have other symptoms

How long have you had one of these signs:  1 day  2 to 3 days  4 to 7 days  7 to 15 days  15 to 30 days  > 30 days

In the last 12 months, how many different sexual partners have you had?

Male partner(s) : 0 1 2 3 4 5 6 7 8 9  >10 Female partner(s) : 0 1 2 3 4 5 6 7 8 9  >10

In the last 12 months, have you used a condom?

- for vaginal penetration  Always  Often  Rarely  Never  Not practiced

- for insertive fellatio (your sex in her/his mouth)  Always  Often  Rarely  Never  Not practiced

- for receptive fellatio (her/his sex in your mouth)  Always  Often  Rarely  Never  Not practiced

If receptive fellatio practiced : I accepted the sample in the mouth  Yes  No

- for insertive anal penetrations  Always  Often  Rarely  Never  Not practiced

- for receptive anal penetration  Always  Often  Rarely  Never  Not practiced

If receptive penetration is practiced : I have accepted the sample in the anus  Yes  No

In the last 12 months, have you given money (or drugs) in exchange for sex?  Yes  No

In the last 12 months, have you received money (or drugs) in exchange for sex?  Yes  No

**In the last 12 months, have you had a stable relationship?**  Yes  No

**If yes**, this partner is  A man  A woman

His HIV/AIDS status is  Negative  Positive  You don't know

During your last sexual intercourse with this stable partner did you use a condom(s)?

- for fellatio  Yes  No  Not practiced

- for vaginal or anal penetration  Yes  No  Not practiced

**In the last 12 months, have you had occasional partners?**  Yes  No

**If yes** this partner is  A man  A woman

His HIV/AIDS status is  Negative  Positive  You don't know

Where did you meet your occasional partners? (several choices possible)

acquaintance  prostitution  meeting in a nightclub/bar  meeting via internet  Other

During your last sexual intercourse with an occasional partner did you use a condom(s)?

- for fellatio  Yes  No  Not practiced

- for vaginal or anal penetration  Yes  No  Not practiced

**Have you ever used drugs (excluding alcohol and zamal) by any route?**  intravenous  nasal (sniff)  other

**Have you ever had sexual intercourse after consuming :**

Alcohol  Cannabis/zamal  ecstasy  cocaine  heroin  amphetamine  GHB  LSD  ketamine

**Did you use a condom during sex?**  Yes  No

**If you are a woman :** Do you have child(ren)?  Yes  No

Have you been pregnant in the last 12 months?  Yes  No

Have you ever had spontaneous abortion?  Yes  No

Have you ever had difficulty getting pregnant?  Yes  No  I did not tried

**What is the age of your first sexual intercourse? :**  <11 years  11 to 14 years  15 to 17 years  18 to 21 years  22 to 25 years  >25 years

**What is your educational level?**  Brevet  Baccalaureat  Higher studies  Others

**What is your monthly income?**  <500 €  500€-1000€  1000€-1500€  1500-2000€  2000-3000€  3000-4000€  >4000€  
 I am a at middle school  I am a at high school  I am a student

**Thank you for your  
participation**

Do not fold
